# Supplementary material for: A digital health weight-loss intervention in severe obesity
Source: PubMed Central journal article supplement — Digit Health. 2020 Mar 4;6:2055207620910279. doi: 10.1177/2055207620910279 (PMC7059223; doi:10.1177/2055207620910279), 2020-03-04
Supplement: DHJ910279_Supplemental_Material.pdf [file DHJ910279_Supplemental_Material.pdf]

# Appendix 1:

## A: Meal replacement biscuit nutritional information

### NUTRITION INFORMATION

| items                  | per 100g | NRV % |
|------------------------|----------|-------|
| energy                 | 1792kJ   | 21%   |
| protein                | 10.2g    | 17%   |
| fat                    | 16.1g    | 27%   |
| –saturated fatty acid  | 2.9g     | 15%   |
| –trans fatty acid      | 0g       |       |
| carbohydrate           | 53.4g    | 18%   |
| dietary fiber          | 14.4g    | 58%   |
| sodium                 | 315mg    | 16%   |
| vitamin A              | 13µg RE  | 2%    |
| vitamin B <sub>1</sub> | 0.46mg   | 33%   |
| vitamin B <sub>2</sub> | 0.88mg   | 63%   |
| vitamin B <sub>6</sub> | 0.43mg   | 31%   |
| niacin                 | 6.35mg   | 45%   |
| folic acid             | 62µg     | 26%   |
| calcium                | 300mg    | 38%   |
| iron                   | 4.6mg    | 31%   |
| zinc                   | 1.61mg   | 11%   |
| selenium               | 3.8µg    | 8%    |

**PRODUCT TYPE:** fermented biscuit

**INGREDIENT:** wheatmeal,soybean protein powder,soybean oil,egg,albumen,white soft suger,shii-take, black fungus,hericium erinaceus,hen of the woods,dictyophora,instant seaweed,cassiae semen,kelp,emblica, wheat bran,starch,edible salt,retinol acetate ( vitamin A ),thiamine hydrochloride ( vitamin B<sub>1</sub> ), riboflavin ( vitamin B<sub>2</sub> ),pyridoxine hydrochloride ( vitamin B<sub>6</sub> ),nicotinic acid,folic acid,ferrous sulfate, calcium carbonate,zinc gluconate,sodium selenite

**FOOD ADDITIVES:** glucomannan,maltitol,cellulose microcrystalline ,sodium bicarbonate,calcium dihydrogen phoshate, disodium pytophosphate,ammonium bicarbonate,distarch phosphate,phospholipids

**NET WEIGHT:** 15gX24 **EXECUTIVE STANDARD:** GB/T 20980 **SHELF LIFE:** 300 days **USAGE LEVEL:** ready-to-eat

**STORAGE CONDITION:** stored at cool,dry and ventilated place

**DATE OF MANUFACTURE:** see code on the back of package **SERVICE HOTLINE:** 400-998-6111

**CONSIGNOR:** Hangzhou Yufit Biological and Technology Co., Ltd.

**ADDRESS:** Room 503, Block 1, Xiaochengtiandi Business Centre Economic & Technological Development Zone, Hangzhou, Zhejiang

**CONSIGNEE:** Xiangyang Dashan Health Food Co., Ltd.

**ADDRESS:** No. 993, Chudu Avenue, Yicheng Economic Development Zone, Xiangyang City, Hubei

**PLACE OF ORIGIN:** Hubei Xiangyang **FOOD PRODUCTION LICENSE NUMBER:** SC11642068400016

**CONSIGNEE:** Baishan Dashanhe Weijian Bio-Technology Co., Ltd.

**ADDRESS:** No.888, Kuangxin Road,Minhua Village,Hunjiang District,baishan,jilin

**PLACE OF ORIGIN:** Jilin Baishan **FOOD PRODUCTION LICENSE NUMBER:** SC10822060242458

**ALLERGEN INFORMATION:** bran, egg, phospholipids, soybean.

**NOTES:** The product belongs to the category of food rather than that of medicine or health product. It has no treatment effects for any kind of diseases. If you have any diseases, please consult a doctor. In addition, stop eating immediately if allergy or other uncomfortable symptoms occur during use.

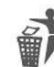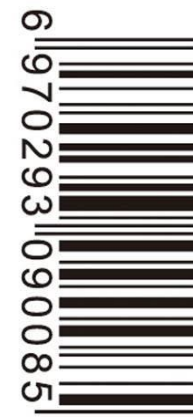

**KINDLY REMINDER: IF YOU FIND AIR LEAKAGE, MOLD, OXYGEN ABSORBENT DAMAGE OR OTHER QUALITY ISSUES, PLEASE DO NOT USE THE PRODUCT.**

## Appendix 1 (cont):

**B:** Meal replacement biscuit

**C:** Breakfast meal options

**D:** Daily summary of nutritional plan

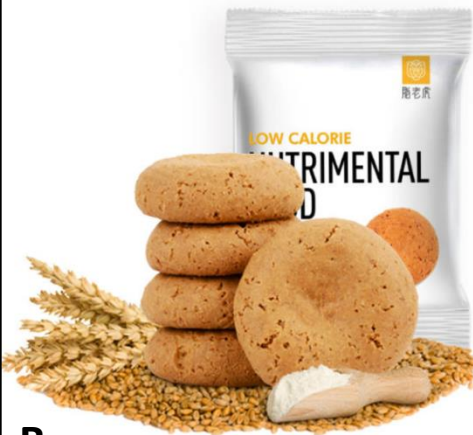

**B**

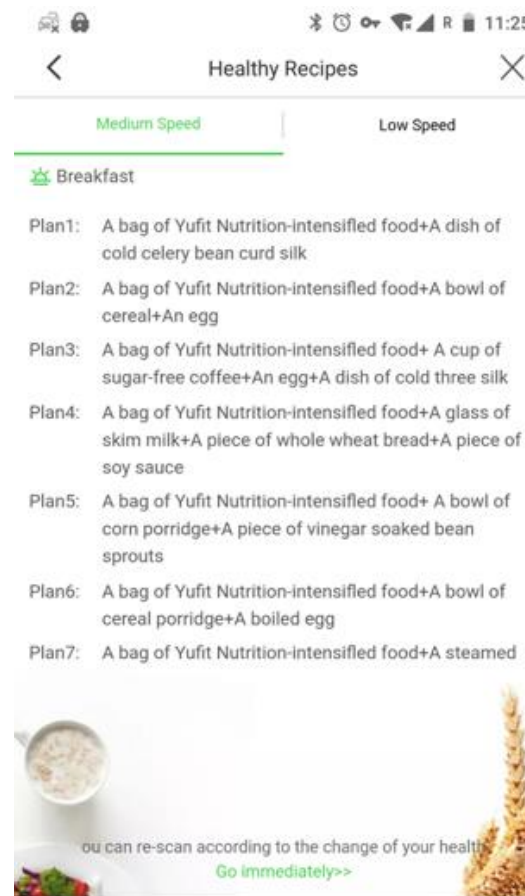

**C**

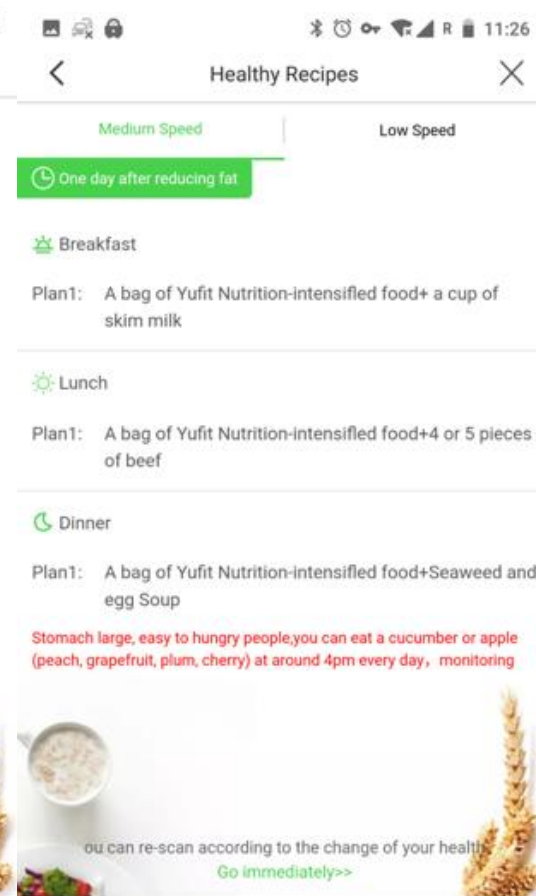

**D**
